# Supplementary material for: Integrated genome-wide association, coexpression network, and expression single nucleotide polymorphism analysis identifies novel pathway in allergic rhinitis
Source: PubMed Central journal article supplement (PMC4127082; doi:10.1186/1755-8794-7-48), 2014-08-02

**Figure S1:** Manhattan plots for the European American, Latino, and African American/African Caribbean genome-wide association and meta-analysis results for allergic rhinitis

European American ( $\lambda_{GC} = 1.00$ )

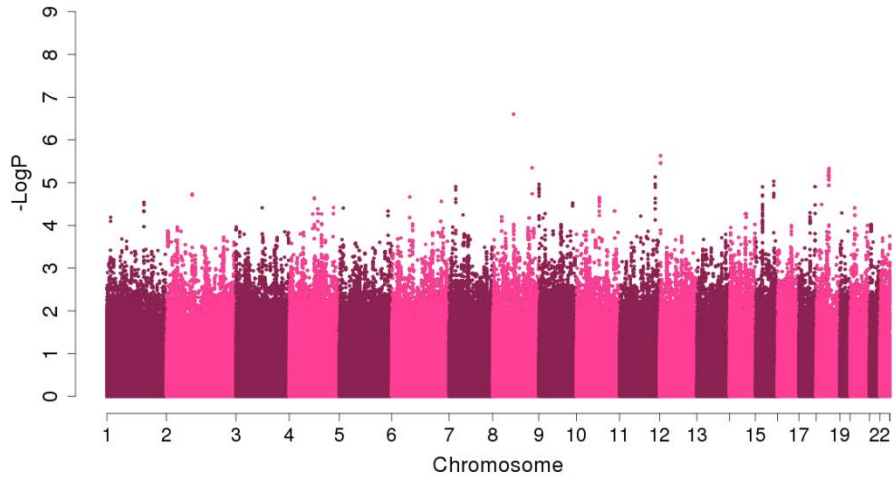

African American/African Caribbean ( $\lambda_{GC} = 1.05$ )

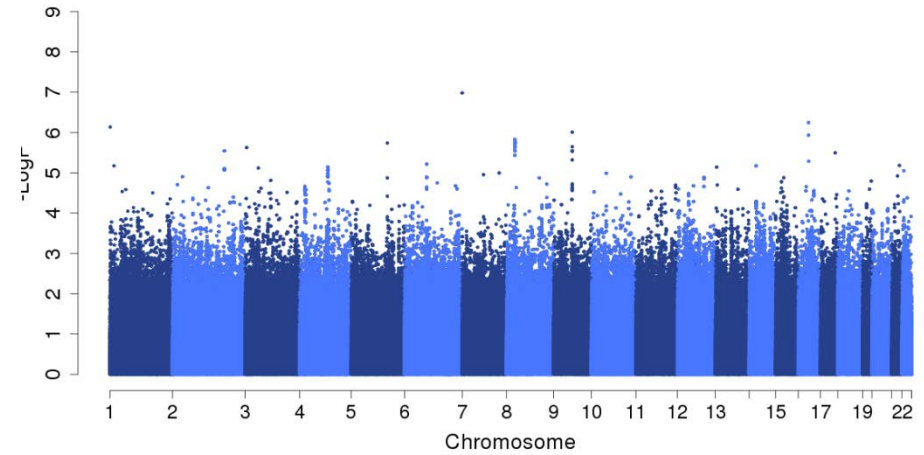

Latino ( $\lambda_{GC} = 1.07$ )

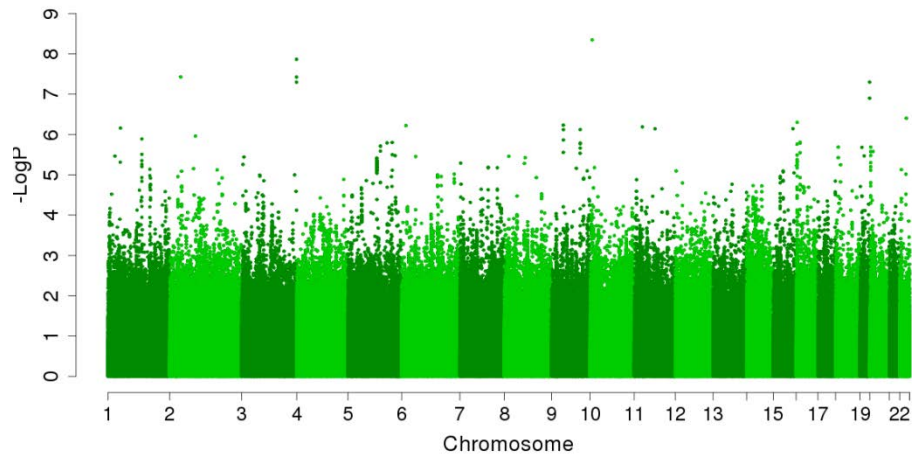

Meta-analysis ( $\lambda_{GC} = 1.06$ )

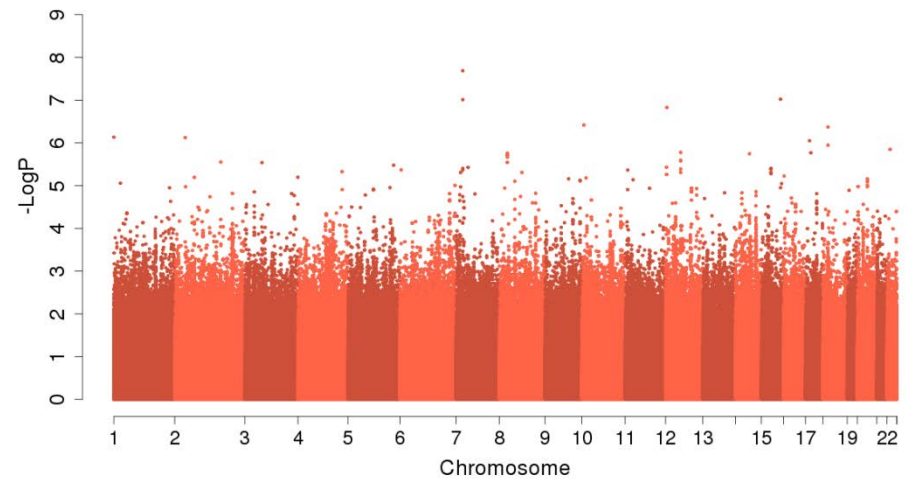

Supplement: 1755-8794-7-48-S1.pdf [file 1755-8794-7-48-S1.pdf]
