# Supplementary material for: Integrated genome-wide association, coexpression network, and expression single nucleotide polymorphism analysis identifies novel pathway in allergic rhinitis
Source: PubMed Central journal article supplement (PMC4127082; doi:10.1186/1755-8794-7-48), 2014-08-02

**Figure S2:** QQ plot for the GWAS meta-analysis of allergic rhinitis across ethnic groups

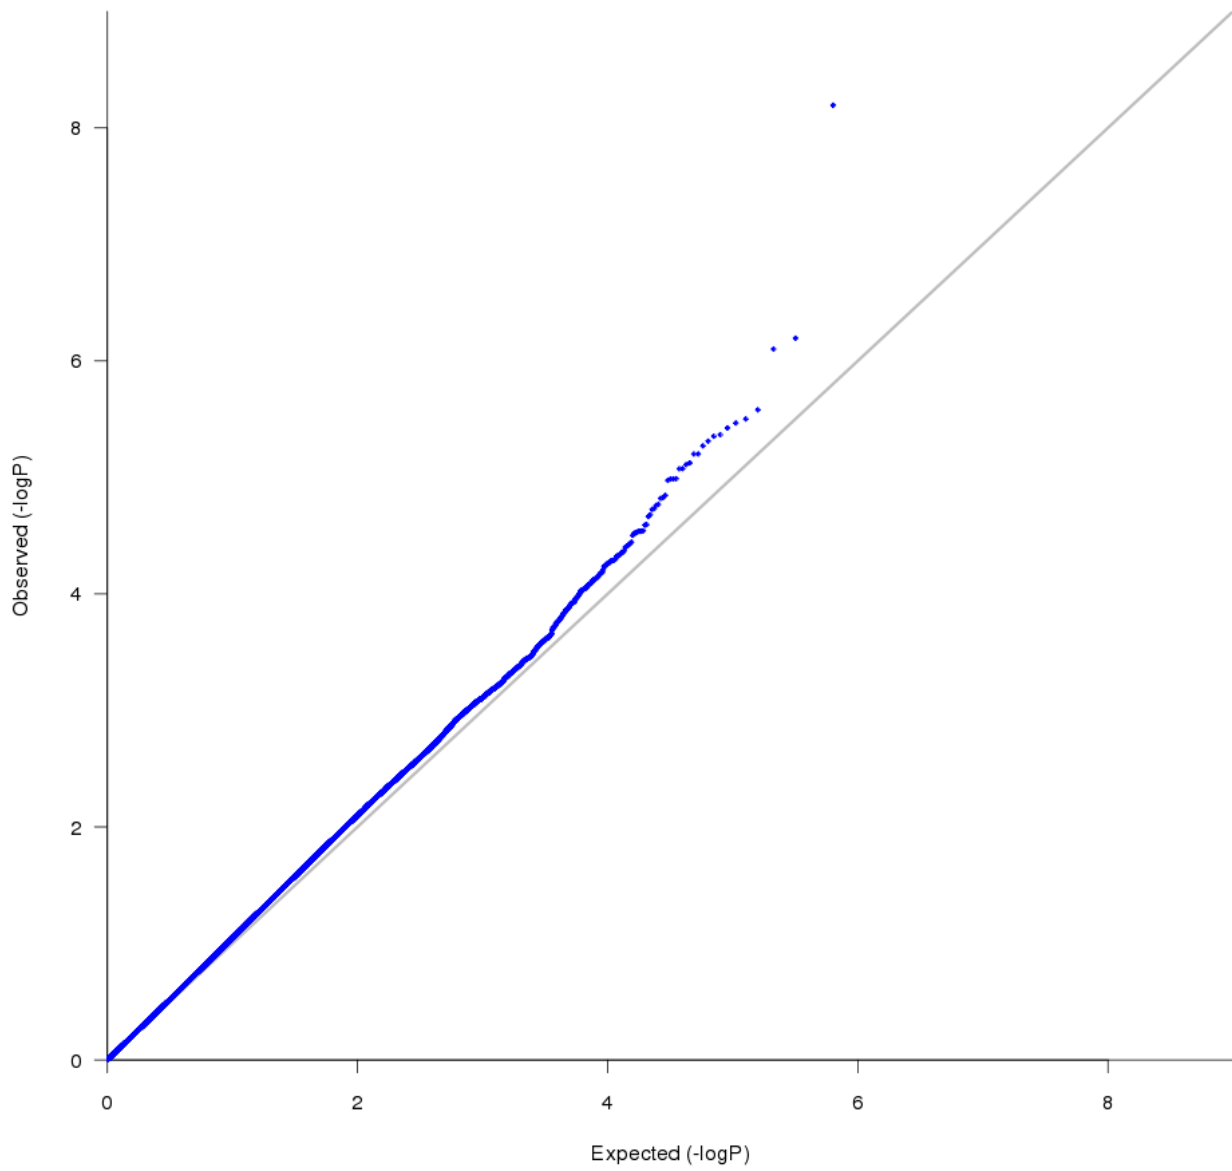

Supplement: 1755-8794-7-48-S3.pdf [file 1755-8794-7-48-S3.pdf]
