# Supplementary material for: Integrated genome-wide association, coexpression network, and expression single nucleotide polymorphism analysis identifies novel pathway in allergic rhinitis
Source: PubMed Central journal article supplement (PMC4127082; doi:10.1186/1755-8794-7-48), 2014-08-02
Supplement: 1755-8794-7-48-S5.pdf [file 1755-8794-7-48-S5.pdf]

**Table S2: Mean Rsq values for genome-wide significant loci in the GWAS of allergic rhinitis among Latinos**

| SNP        | Rsq*  |
|------------|-------|
| rs12973620 | 0.906 |
| rs6583203  | 0.722 |
| rs17133587 | 0.598 |
| rs11680788 | 0.624 |

\*estimates the squared correlation between imputed and true genotypes. Typically, a cut-off of 0.30 will flag most of the poorly imputed SNPs, but only a small number (<1%) of well imputed SNPs [59].
