# Supplementary material for: Integrated genome-wide association, coexpression network, and expression single nucleotide polymorphism analysis identifies novel pathway in allergic rhinitis
Source: PubMed Central journal article supplement (PMC4127082; doi:10.1186/1755-8794-7-48), 2014-08-02
Supplement: 1755-8794-7-48-S8.pdf [file 1755-8794-7-48-S8.pdf]

**Table S3:** P values for association with allergic rhinitis for 17 loci identified in previous GWAS of allergic rhinitis

| SNP        | Location | Association reported by      | Original study        | Bunyavanich et al. |                |
|------------|----------|------------------------------|-----------------------|--------------------|----------------|
|            |          |                              |                       | European American  | Meta-Analysis  |
|            |          |                              | P value               | P value            | P value        |
| rs2155219  | 11q13.5  | Ramasamy et al. <sup>4</sup> | $3.8 \times 10^{-8}$  | 0.22               | 0.06           |
| rs2101521  | 4p14     | Hinds et al. <sup>9</sup>    | $5.3 \times 10^{-21}$ | 0.52               | 0.79           |
| rs1438673  | 5q22.1   | Hinds et al. <sup>9</sup>    | $2.3 \times 10^{-20}$ | 0.31               | 0.51           |
| rs2155219  | 11q13.5  | Hinds et al. <sup>9</sup>    | $1.6 \times 10^{-19}$ | 0.22               | 0.06           |
| rs10189629 | 2q12.1   | Hinds et al. <sup>9</sup>    | $1.8 \times 10^{-16}$ | 0.48               | <b>0.023</b>   |
| rs6906021  | 6p21.32  | Hinds et al. <sup>9</sup>    | $7.1 \times 10^{-15}$ | 0.99               | 0.17           |
| rs9266772  | 6p21.33  | Hinds et al. <sup>9</sup>    | $3.2 \times 10^{-12}$ | 0.25               | 0.11           |
| rs7720838  | 5p13.1   | Hinds et al. <sup>9</sup>    | $8.2 \times 10^{-11}$ | 0.67               | 0.67           |
| rs10497813 | 2q33.1   | Hinds et al. <sup>9</sup>    | $6.1 \times 10^{-10}$ | <b>0.012</b>       | <b>0.00099</b> |
| rs9860547  | 3q28     | Hinds et al. <sup>9</sup>    | $1.2 \times 10^{-9}$  | 0.83               | 0.94           |
| rs7032572  | 9p24.1   | Hinds et al. <sup>9</sup>    | $1.7 \times 10^{-9}$  | 0.13               | 0.24           |
| rs6021270  | 20q13.2  | Hinds et al. <sup>9</sup>    | $6.9 \times 10^{-9}$  | 0.87               | 0.43           |
| rs9303280  | 17q12    | Hinds et al. <sup>9</sup>    | $8.9 \times 10^{-9}$  | 0.12               | <b>0.0020</b>  |
| rs17228058 | 15q22.33 | Hinds et al. <sup>9</sup>    | $1.2 \times 10^{-8}$  | 0.07               | 0.25           |
| rs962993   | 10p14    | Hinds et al. <sup>9</sup>    | $1.5 \times 10^{-8}$  | 0.44               | 0.07           |
| rs17388568 | 4q27     | Hinds et al. <sup>9</sup>    | $3.9 \times 10^{-8}$  | <b>0.0030</b>      | <b>0.0031</b>  |
| rs1998359  | 14q21.1  | Hinds et al. <sup>9</sup>    | $4.8 \times 10^{-8}$  | 0.75               | 0.99           |

\*P values with nominal significance (P value  $\leq 0.05$ ) in Bunyavanich et al. are bolded
