# Supplementary material for: Integrated genome-wide association, coexpression network, and expression single nucleotide polymorphism analysis identifies novel pathway in allergic rhinitis
Source: PubMed Central journal article supplement (PMC4127082; doi:10.1186/1755-8794-7-48), 2014-08-02
Supplement: 1755-8794-7-48-S10.pdf [file 1755-8794-7-48-S10.pdf]

**Table S4: Results of the GWAS and meta-analysis for allergic rhinitis among subjects without asthma**

| SNP        | Location | Allele | P value           |          |                  |                 | OR (95% CI)         |                     |                     |                     | Allele Frequency  |        |                  |
|------------|----------|--------|-------------------|----------|------------------|-----------------|---------------------|---------------------|---------------------|---------------------|-------------------|--------|------------------|
|            |          |        | European American | Latino   | African American | Meta - Analysis | European American   | Latino              | African American    | Meta - Analysis     | European American | Latino | African American |
| rs17152484 | 5q23.2   | C      | 4.08E-07          | 0.56     | 0.32             | 1.17E-05        | 0.46<br>(0.15-0.76) | 0.90<br>(0.53-1.22) | 0.69<br>(0.00-1.43) | 0.61<br>(0.38-0.83) | 0.84              | 0.84   | 0.93             |
| rs12520745 | 5q23.2   | T      | 6.20E-07          | 0.63     | 0.94             | 1.26E-04        | 0.47<br>(0.18-0.77) | 0.92<br>(0.55-1.27) | 0.98<br>(0.47-1.49) | 0.66<br>(0.54-0.82) | 0.83              | 0.83   | 0.86             |
| rs2606618  | 6q22.31  | T      | 0.0011            | 0.0038   | 0.0080           | 3.87E-07        | 1.60<br>(1.32-1.88) | 1.53<br>(1.24-2.58) | 1.77<br>(1.25-2.20) | 1.60<br>(1.33-1.92) | 0.17              | 0.40   | 0.21             |
| rs7780001  | 7p21.1   | A      | 0.023             | 1.71E-04 | 0.0048           | 3.75E-07        | 0.70<br>(0.39-1.01) | 0.55<br>(0.24-0.63) | 0.55<br>(0.14-0.97) | 0.61<br>(0.41-0.80) | 0.87              | 0.80   | 0.76             |
| rs2823048  | 21q21.1  | A      | 8.19E-07          | 0.78     | 0.71             | 2.16E-04        | 0.52<br>(0.26-0.78) | 1.06<br>(0.67-1.51) | 0.92<br>(0.48-1.36) | 0.69<br>(0.50-0.89) | 0.81              | 0.88   | 0.81             |
| rs2823053  | 21q21.1  | A      | 8.39E-07          | 0.99     | 0.66             | 3.00E-04        | 0.51<br>(0.23-0.78) | 1.00<br>(0.62-1.41) | 0.93<br>(0.58-1.27) | 0.71<br>(0.52-0.90) | 0.82              | 0.84   | 0.55             |
| rs2834629  | 21q22.12 | T      | 0.93              | 0.92     | 5.24E-07         | 0.0057          | 1.03<br>(0.47-1.59) | 0.96<br>(0.17-0.73) | 0.17<br>(0.00-0.86) | 0.58<br>(0.40-0.86) | 0.91              | 0.92   | 0.88             |
