# Supplementary material for: Integrated genome-wide association, coexpression network, and expression single nucleotide polymorphism analysis identifies novel pathway in allergic rhinitis
Source: PubMed Central journal article supplement (PMC4127082; doi:10.1186/1755-8794-7-48), 2014-08-02
Supplement: 1755-8794-7-48-S12.pdf [file 1755-8794-7-48-S12.pdf]

**Table S5: Sample composition of the stratified analysis according to asthma status**

|                                    | Asthma               |                   | No Asthma            |                   |
|------------------------------------|----------------------|-------------------|----------------------|-------------------|
|                                    | No Allergic Rhinitis | Allergic Rhinitis | No Allergic Rhinitis | Allergic Rhinitis |
| European American                  | 488                  | 623               | 674                  | 249               |
| Latino                             | 545                  | 1029              | 588                  | 164               |
| African American/African Caribbean | 162                  | 399               | 464                  | 248               |
| Total                              | 1195                 | 2051              | 1726                 | 661               |
